# Supplementary material for: Does frequency of supportive supervisory visits influence health service delivery?—Dose and response study
Source: PubMed Central journal article supplement (PMC7297318; doi:10.1371/journal.pone.0234819), 2020-06-16
Supplement: pone.0234819.s002.pdf [file pone.0234819.s002.pdf]

| FOLLOW-UP CHECKLIST: HEALTH CENTER (HC)         |                                                                 |    |      |           |              |                |           |
|-------------------------------------------------|-----------------------------------------------------------------|----|------|-----------|--------------|----------------|-----------|
| Name of Health Center (HC)                      |                                                                 |    |      | Visitors  |              |                |           |
|                                                 |                                                                 |    |      | Name      | Organization | Responsibility | Signature |
| Region                                          |                                                                 |    |      |           |              |                |           |
| Cluster                                         |                                                                 |    |      |           |              |                |           |
| Distance to facility                            |                                                                 |    |      |           |              |                |           |
| Zone                                            |                                                                 |    |      |           |              |                |           |
| Woreda                                          |                                                                 |    |      |           |              |                |           |
| Woreda performance tier                         | 1- High performing<br>2- Medium performing<br>3- Low performing |    |      |           |              |                |           |
| Date (G.C)                                      | DD                                                              | MM | YYYY |           |              |                |           |
| Person in-charge during the visit in the HC     |                                                                 |    |      |           |              |                |           |
| GPS Coordinate (in six digits) at the main gate |                                                                 |    |      | Longitude |              |                |           |
|                                                 |                                                                 |    |      | Latitude  |              |                |           |

**Instruction for responses:** Score **1** for **Yes** responses, **2** for **No** responses, **NA** for **Not Applicable** and write the **value/#** for numeric questions.

| SN         | Questions                                                        | Yes=1,<br>No=2,<br>#,<br>NA | Remarks |
|------------|------------------------------------------------------------------|-----------------------------|---------|
| <b>I</b>   | <b>Basic information</b>                                         |                             |         |
| 1.1        | Catchment population of the HC                                   |                             |         |
| 1.2        | <b>Total number</b> of Health Posts under the HC                 |                             |         |
| 1.3        | <b>Number</b> of outreach sites (EPI, FP, etc.)                  |                             |         |
| 1.4        | <b>Number</b> of technical staff in the HC                       |                             |         |
| 1.5        | <b>Number</b> of supportive staff in the HC                      |                             |         |
| 1.6        | Availability of water                                            |                             |         |
| 1.7        | Availability of electricity                                      |                             |         |
| 1.8        | Facility distance from woreda distance                           |                             |         |
| 1.9        | Facility head experience, in years                               |                             |         |
| <b>II</b>  | <b>Access</b>                                                    |                             |         |
| 2.1        | Provide all exempted health services free of charge              |                             |         |
| 2.2        | Provide health care services to CBHI beneficiaries               |                             |         |
| 2.3        | Access to roads                                                  |                             |         |
| 2.4        | Has at least one ambulance                                       |                             |         |
| <b>III</b> | <b>Patient centered care</b>                                     |                             |         |
| 3.1        | Trained staff use chart booklets while providing services        |                             |         |
| 3.2        | Delivery partograph is used correctly                            |                             |         |
| 3.3        | Under-five children classified correctly                         |                             |         |
| 3.4        | Under-five children treated correctly                            |                             |         |
| <b>IV</b>  | <b>Service organization and management</b>                       |                             |         |
| 4.1        | Reviewed and reported EHCRIG chapters in the most recent quarter |                             |         |

| SN         | Questions                                                                           | Yes=1,<br>No=2,<br>#,<br>NA | Remarks |
|------------|-------------------------------------------------------------------------------------|-----------------------------|---------|
| 4.2        | Followed IPLS standards to ensure uninterrupted supply chain                        |                             |         |
| 4.3        | Used HMIS data for planning and decision making                                     |                             |         |
| 4.4        | Used LQAS for data accuracy check                                                   |                             |         |
| 4.5        | HC Director trained on Leadership, Management and Governance (LMG)                  |                             |         |
| 4.6        | Established case review/audit system for maternal and newborn death                 |                             |         |
| 4.7        | Have an EPI defaulter tracing mechanism                                             |                             |         |
| 4.8        | Established a QI team and assigned a focal person for QA/QI                         |                             |         |
| <b>V</b>   | <b>Service availability</b>                                                         |                             |         |
| 5.1        | All expected FP methods are available in all days in the past one month             |                             |         |
| 5.2        | PPFP service is available in delivery room                                          |                             |         |
| 5.3        | Provided all BEmONC signal functions                                                |                             |         |
| 5.4        | Provided women friendly delivery services                                           |                             |         |
| 5.5        | Provided ferrous sulfate for pregnant women during ANC                              |                             |         |
| 5.6        | Functional maternity waiting room/home                                              |                             |         |
| 5.7        | ANC clients tested for syphilis                                                     |                             |         |
| 5.8        | Mothers received Uterotonics in the third stage of labor or immediately after birth |                             |         |
| 5.9        | Newborns received newborn care                                                      |                             |         |
| 5.10       | Newborns with neonatal sepsis received treatment                                    |                             |         |
| 5.11       | Asphyxiated newborns resuscitated                                                   |                             |         |
| <b>VI</b>  | <b>Population health management</b>                                                 |                             |         |
| 6.1        | Exercise community feedback collecting mechanisms/town hall meetings                |                             |         |
| 6.2        | Have a social behavior change communication plan                                    |                             |         |
| 6.3        | Work together with kebele administration                                            |                             |         |
| <b>VII</b> | <b>Major challenges and actions taken by the visited HC</b>                         |                             |         |
|            |                                                                                     |                             |         |

**At the end of the visit**

1. Hold brief meeting with the HC personnel and reflect on key findings
2. Identify things that need to be followed by HC, WorHO, ZHD and RHB.
3. Develop action plan
